# Supplementary material for: Isolation and Characterization of Two Squalene Epoxidase Genes from Botryococcus braunii, Race B
Source: PLoS One. 2015 Apr 1;10(4):e0122649. doi: 10.1371/journal.pone.0122649 (PMC4382194; doi:10.1371/journal.pone.0122649)
Supplement: S1 Table — (XLSX) [file pone.0122649.s001.xlsx]

## Sheet: Sheet1
	Table S1. Primers used in this study.
	Analyses	Primers	Lengths	Sequences	Comments
	Internal fragment	SQEI-internal-F	22mer	5′-CATGGTCCTCGTCCATTCCTTC-3′
		SQEI-internal-R	22mer	5′-GAGCAGTGCCTCCTTTCTCAGC-3′
	RACEs	SQEI-5RACE-F1			Supplied from kit as universal primer A mix
		SQEI-5RACE-R1	26mer	5′-CCTCCTTTCTCAGCAGGAAGCCACAG-3′
		SQEI-3RACE-F	26mer	5′-CCTCGGTTTCTTTTCGTGCTTCAACC-3′
		SQEI-3RACE-R			Supplied from kit as universal primer A mix
		SQEI-5RACE-F2	23mer	5′-GGCCGCTCTAGAACTAGTGGATC-3′	Phagemid 5′ anchor primer
		SQEI-5RACE-R2	22mer	5′-CCACATTCAATAGCGAAGTGAC-3′
	Full-lengths	SQEI-full-F	24mer	5′-ATGATTGTTAGGCCATTTGCAGTG-3′
		SQEI-full-R	24mer	5′-TCAGCAGGAAGCCACAGAGTACAG-3′
		SQEII-full-F	22mer	5′-GGTGAGCCATAGTGCTCCCTTG-3′
		SQEII-full-R	22mer	5′-GGAACAAGAATCAGGCGAATGG-3′
	Yeast expressions	SQEI-ORF-F	28mer	5′-CCACTAGTATGCAAAATACTAGGGGTGC-3′	SpeI site is shown with an underline.
		SQEI-ORF-R	29mer	5′-CGCGTCGACTCATGCTCTATGTAAGCAGG-3′	SalI site is shown with an underline.
		SQEII-ORF-F	30mer	5′-CCACTAGTATGTGCGCCCCAATTGCCTTGA-3′	SpeI site is shown with an underline.
		SQEII-ORF-R	30mer	5′-CGCCTCGAGTCAGTCGACCGTGACAAGGGC-3′	XhoI site is shown with an underline.
		Vector-F	23mer	5′-AGATGTCGTTGTTCCAGAGCTGA-3′
		Vector-R	24mer	5′-TCGCCGAAGAAGTTAAGAAAATCC-3′
	Southern blots	SQEI-probe-F	22mer	5′-CATGGTCCTCGTCCATTCCTTC-3′
		SQEI-probe-R	22mer	5′-GAGCAGTGCCTCCTTTCTCAGC-3′
		SQEII-probe-F	22mer	5′-CAATTGCCTTGAGGGACCTTTG-3′
		SQEII-probe-R	22mer	5′-GTGAAGCAGTCCAGCAGCAGAG-3′
	qT-RTPCRs	SQEI-qRTPCR-F	21mer	5′-CGGCATCCTCGGTTTCTTTTC-3′
		SQEI-qRTPCR-R	21mer	5′-CAGCTGGATTGGCCACAACAC-3′
		SQEII-qRTPCR-F	21mer	5′-GTCATGGAGCAGTTGCGGTTC-3′
		SQEII-qRTPCR-R	21mer	5′-TACCCTCCGTCCACAGAATGG-3′
		GAPDH-qRTPCR-F	20mer	5′-ACCAGTCTTCCACCATCGAC-3′
		GAPDH-qRTPCR-R	20mer	5′-ATCTCAGCCAAGTCCACCAC-3′
